# Supplementary material for: 13C15N: glucagon-based novel isotope dilution mass spectrometry method for measurement of glucagon metabolism in humans
Source: PubMed Central journal article supplement (PMC9118570; doi:10.1186/s12014-022-09344-2), 2022-05-19

**A**

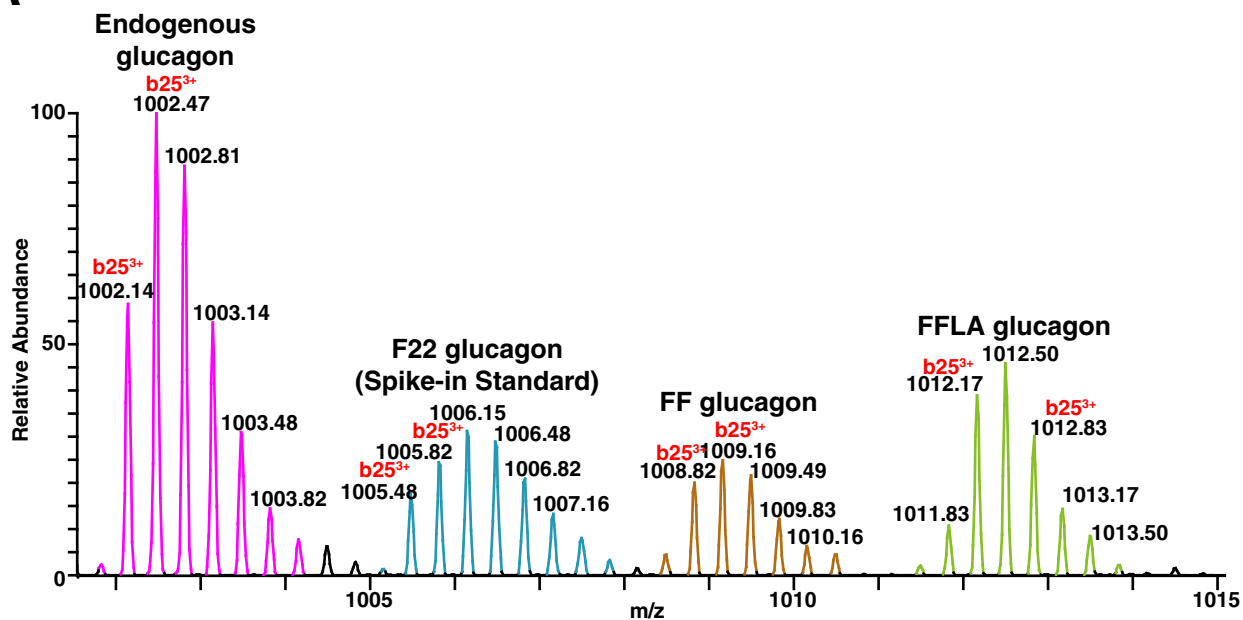

**B**

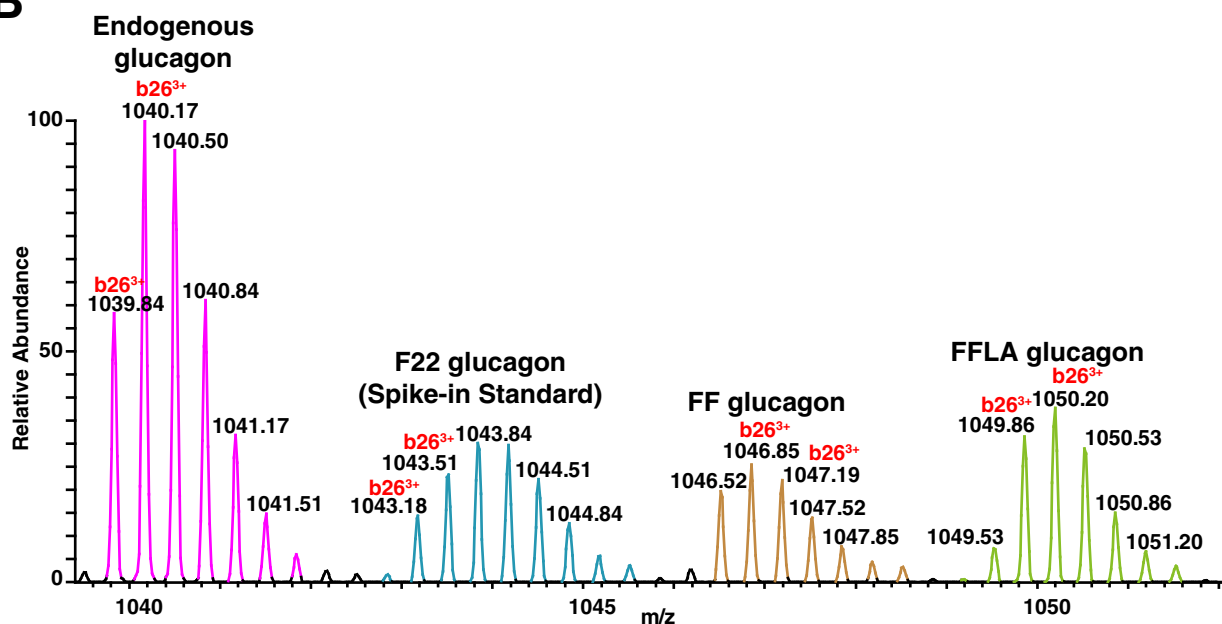

**C**

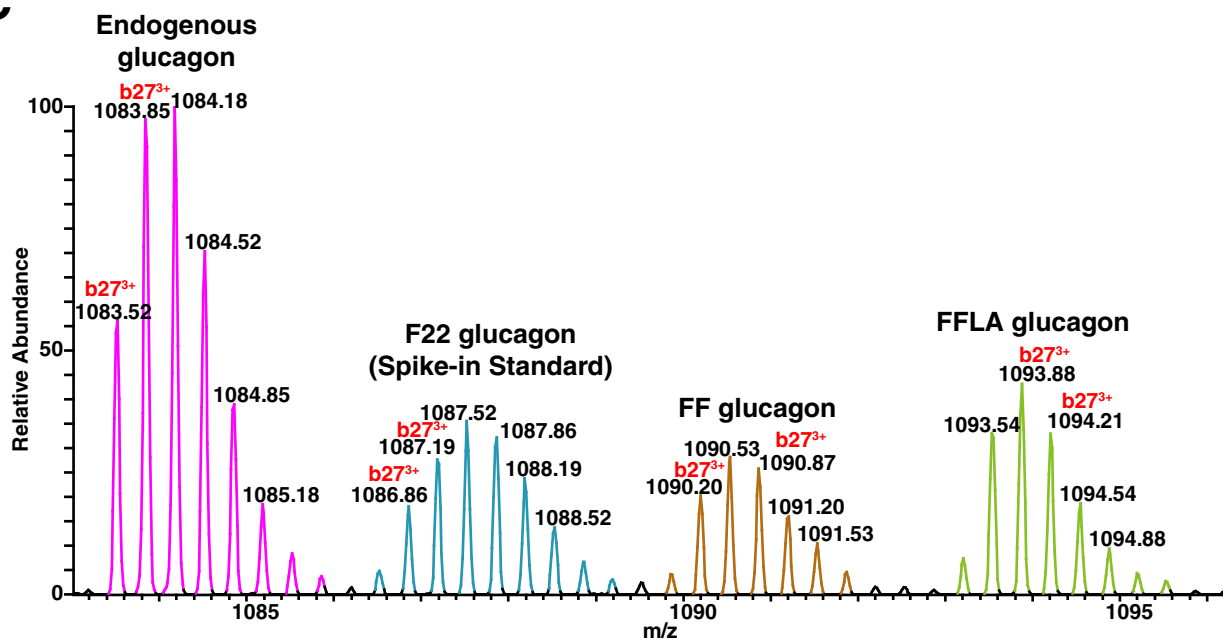

Supplement: 12014_2022_9344_MOESM1_ESM.pdf [file 12014_2022_9344_MOESM1_ESM.pdf]
